# Supplementary material for: A Conserved Intramolecular Ion-Pair Plays a Critical but Divergent Role in Regulation of Dimerization and Transport Function among the Monoamine Transporters
Source: MDPI journal article supplement (doi:10.3390/ijms25074032), 2024-04-04
Supplement: s1 [file s1]

**Table S1.** Kinetic parameters of APP<sup>+</sup> uptake by SERT WT and its mutants with or without CuP treatment.

|                          | APP <sup>+</sup> |                 |
|--------------------------|------------------|-----------------|
|                          | $K_m$ (μM)       | $V_{max}$ (AFU) |
| <b>WT</b>                | 2.40 ± 0.05      | 24.32 ± 1.86    |
| <b>L321C</b>             | 2.43 ± 0.08      | 22.31 ± 1.27    |
| <b>L321C + CuP</b>       | 2.32 ± 0.17      | 8.47 ± 0.27*    |
| <b>K319A/L321C</b>       | 2.45 ± 0.08      | 25.59 ± 1.66    |
| <b>K319A/L321C + CuP</b> | 2.54 ± 0.20      | 17.65 ± 1.54*   |
| <b>E322A/L321C</b>       | 2.59 ± 0.10      | 26.83 ± 2.33    |
| <b>E322A/L321C + CuP</b> | 2.62 ± 0.08      | 19.97 ± 2.25*   |

APP<sup>+</sup> uptake was measured over a range of APP<sup>+</sup> concentrations (0.01 – 10 μM) with cells stably expressing SERT WT or its mutants as described under “Materials and Methods”. For CuP treatment, CuP at a final concentration of 100 μM was added to the cells for 10 min at 22 °C and then washed away. Results are shown as mean ± SEM averaged from three independent experiments. \*  $p < 0.05$  compared to the respective mutant without CuP treatment.

**Table S2.** Kinetic parameters of ASP<sup>+</sup> uptake by DAT WT and its mutants with or without CuP treatment.

|                    | ASP <sup>+</sup>          |                              |
|--------------------|---------------------------|------------------------------|
|                    | <i>K<sub>m</sub></i> (μM) | <i>V<sub>max</sub></i> (AFU) |
| <b>WT</b>          | 4.28 ± 0.18               | 42.12 ± 3.13                 |
| <b>WT + CuP</b>    | 3.96 ± 0.29               | 23.91 ± 0.89*                |
| <b>R304A</b>       | 4.39 ± 0.21               | 33.76 ± 1.43                 |
| <b>R304A + CuP</b> | 4.18 ± 0.28               | 23.54 ± 1.75*                |
| <b>E307A</b>       | 4.09 ± 0.19               | 31.18 ± 4.52                 |
| <b>E307A + CuP</b> | 3.92 ± 0.42               | 26.41 ± 1.83*                |

ASP<sup>+</sup> uptake was measured over a range of ASP<sup>+</sup> concentrations (0.01 – 10 μM) with cells stably expressing DAT WT or its mutants as described under “Materials and Methods”. For CuP treatment, CuP at a final concentration of 100 μM was added to the cells for 10 min at 22 °C and then washed away. Results are shown as mean ± SEM averaged from three independent experiments. \* *p* < 0.05 compared to the respective mutant without CuP treatment.

**Table S3.** Kinetic parameters of ASP<sup>+</sup> uptake by NET WT and its mutants with or without CuP treatment.

|                   | ASP <sup>+</sup> |                 |
|-------------------|------------------|-----------------|
|                   | $K_m$ (μM)       | $V_{max}$ (AFU) |
| WT                | 3.10 ± 0.08      | 63.82 ± 3.08    |
| K303C             | 3.35 ± 0.11      | 60.60 ± 2.20    |
| K303C + CuP       | 3.20 ± 0.19      | 31.67 ± 1.66*   |
| R301A/K303C       | 3.33 ± 0.16      | 56.97 ± 3.10    |
| R301A/K303C + CuP | 3.55 ± 0.19      | 38.74 ± 1.77*   |
| E304A/K303C       | 3.36 ± 0.18      | 47.15 ± 2.45    |
| E304A/K303C + CuP | 3.22 ± 0.17      | 40.07 ± 1.45*   |

ASP<sup>+</sup> uptake was measured over a range of ASP<sup>+</sup> concentrations (0.01 – 10 μM) with cells stably expressing NET WT or its mutants as described under “Materials and Methods”. For CuP treatment, CuP at a final concentration of 100 μM was added to the cells for 10 min at 22 °C and then washed away. Results are shown as mean ± SEM averaged from three independent experiments. \*  $p < 0.05$  compared to the respective mutant without CuP treatment.

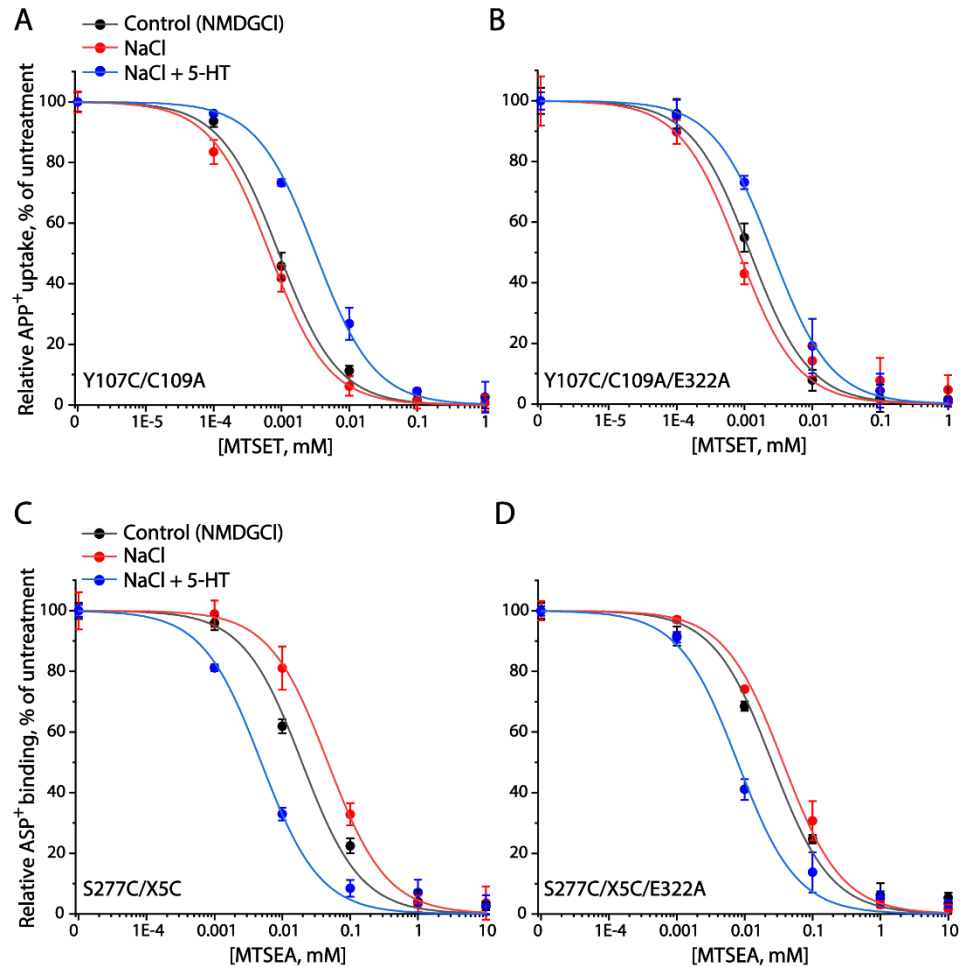

**Figure S1.** MTSET or MTSEA accessibility measurements in SERT. (A, B) MTSET accessibility in the extracellular substrate permeation pathway. MTSET inhibition of APP<sup>+</sup> uptake was measured in the intact cells stably expressing Y107C/C109A or Y107C/C109A/E322A by incubating with MTSET at a range of concentrations (0 -1 mM) in HEPES buffer containing 25 mM HEPES, pH 7.4 and 150 mM NMDGCl, 150 mM NaCl, or 150 mM NaCl plus 10  $\mu$ M 5-HT for 15 min at 22 °C. After washing to remove excess MTSET, APP<sup>+</sup> uptake was measured as described under Section 3. (C, D) MTSEA accessibility in the cytoplasmic substrate pathway. MTSEA inhibition of ASP<sup>+</sup> binding was measured in the digitonin-permeabilized cells expressing S277C/X5C or S277C/X5C/E322A. The cells were incubated with 25  $\mu$ g/mL digitonin for 5 min in HEPES buffer containing 25 mM HEPES, pH 7.4 and 150 mM NMDGCl, 150 mM NaCl, or 150 mM NaCl plus 10  $\mu$ M 5-HT and then with MTSEA at a range of concentrations (0 – 10 mM) in the presence of digitonin for another 15 min at 22 °C. After washing to remove excess MTSEA and digitonin, ASP<sup>+</sup> binding was measured as described under Section 3. All graphs show representative experiments. These experiments were repeated twice with similar results.
